# Supplementary material for: Phytochemical analysis of dried ginger extract and its inhibitory effect and mechanism on Helicobacter pylori and associated ureases
Source: Royal Society of Chemistry journal article supplement (doi:10.1039/d4fo04991h), 2025-01-01
Supplement: d4fo04991h1.pdf [file d4fo04991h1.pdf]

**Figure S1. Assessment of the minimal inhibitory concentrations (MICs) of DGE against *H. pylori* strains**

**DGE inhibited ATCC 43504**

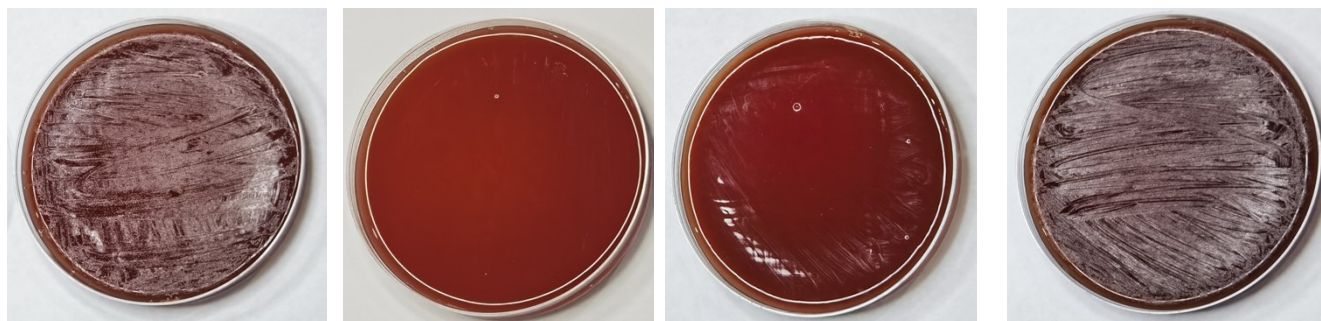

Control

DGE (1.5 mg/mL)

DGE (1.0 mg/mL)

DGE (0.5 mg/mL)

**DGE inhibited NCTC 26695**

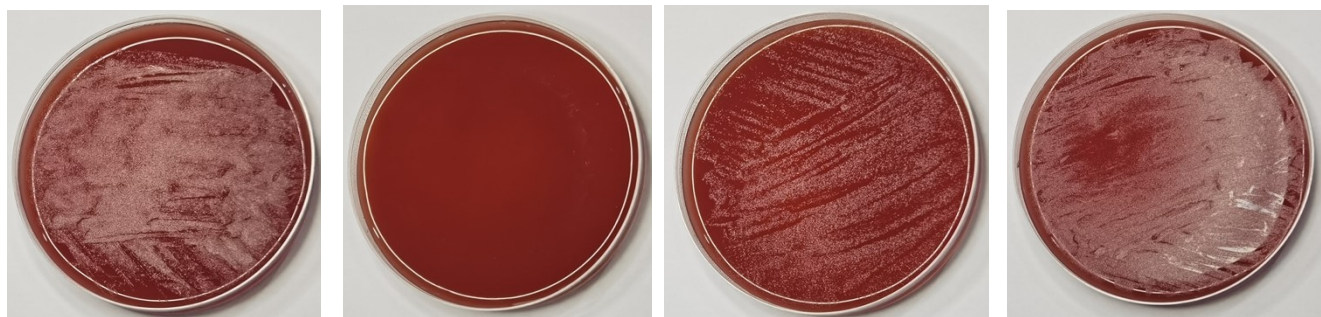

Control

DGE (0.05 mg/mL)

DGE (0.01 mg/mL)

DGE (0.005 mg/mL)

**DGE inhibited HP SS1**

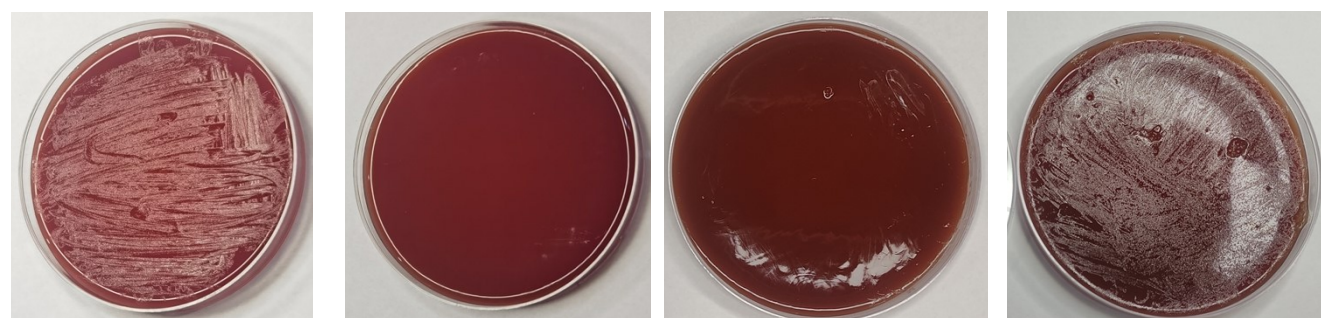

Control

DGE (0.05 mg/mL)

DGE (0.01 mg/mL)

DGE (0.005 mg/mL)

**DGE inhibited ICDC 111001**

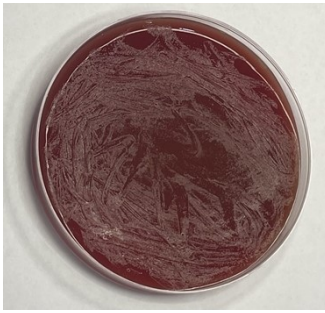

Control

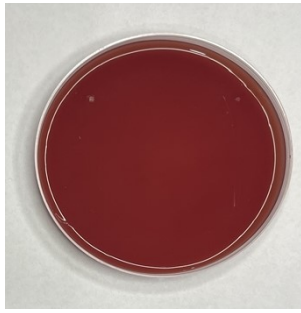

DGE (0.05 mg/mL)

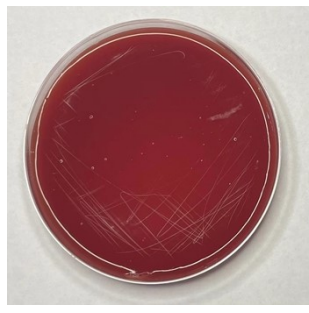

DGE (0.01 mg/mL)

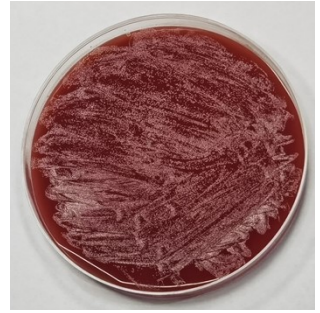

DGE (0.005 mg/mL)
